# Supplementary material for: Enhanced formation of inverted housane through steric effects by rotationally unsymmetric bridgehead substituents in the ring closure of triplet cyclopentane-1,3-diyl diradicals, generated photolytically from 2,3-diazabicyclo[2.2.1]heptene(DBH)-type azoalkanes
Source: Royal Society of Chemistry journal article supplement (doi:10.1039/b211319h), 2003-04-01
Supplement: b211319h.doc [file b211319h.doc]

# Enhanced formation of inverted housane through steric effects by rotationally unsymmetric bridgehead substituents in the ring closure of triplet cyclopentane-1,3-diyl diradicals, generated photolytically from 2,3-diazabicyclo[2.2.1]heptene(DBH)-type azoalkanes

# Waldemar Adam* and Manfred Diedering

Institut für Organische Chemie, Universität Würzburg, Am Hubland

D-97074 Würzburg, Germany

**General Aspects**: NMR spectra were measured on a Bruker AC200 or AC250 in CDCl3 or *d*8-toluene with hexamethyldisiloxane as internal standard. Elemental analyses were performed by the Microanalytical Division of the Institute of Inorganic Chemistry (University of Würzburg). Denitrogenations were carried out at the 333-, 351- and 364-nm laser lines of the continuous-wave argon-ion laser (INNOVA 100, Coherent Company).

**Synthesis of the Azoalkane 1c**

**5,5-Dimethylnona-4,6-dione:** A sample of 4.60 g (33.4 mmol) of K2CO3 was added to a cooled solution (10 °C) of 2.09 g (13.3 mmol) of nona-4,6-dione in 7 mL of DMSO and 4 mL of THF. Under stirring were added dropwise within 5 min 4.74 g (33.5 mmol) of methyl iodide. The mixture was stirred at ca. 20 °C for 2 d, 7 mL of *tert*-butyl methyl ether were added and the suspension was extracted with water (3 x 20 mL) and sat. NaCl solution
(2 x 10 mL). The organic layer was dried over MgSO4 and the solvent evaporated (40 °C, 20 mbar) to yield 2.10 g (11.4 mmol, 85%) of a colorless oil.

1H NMR (200 MHz, CDCl3): 0.84(t, J=7.5 Hz, 6H, CH3), 1.28 (s, 6H, CH3), 1.54 (sextet, J=7.2 Hz, 4H, CH2), 2.32 (t, J=7.3 Hz, 4H, CH2). 13C NMR (50 MHz, CDCl3): 13.1, 16.7, 20.8, 40.0, 62.2, 210.7. IR(neat): = 2970 cm-1, 2945, 2880, 1720, 1699, 1465, 1375.
Anal. Calcd. for C11H20O2 (184.3): C, 71.70; H, 10.94; found: C, 71.50; H, 10.97.

**3,5-Di-*n*-propyl-4,4-dimethyl[4*H*]pyrazol:** To a solution of 4.08 g (22.2 mmol) of
5,5-dimethylnona-4,6-dione in 150 mL of dichloromethane was added 1.18 mL (24.3 mmol) of hydrazine hydrate and the mixture was heated to reflux overnight. After cooling to ca.
20 °C, MgSO4 was added for drying and to remove the excess of hydrazine hydrate and the solvent were evaporated (40 °C, 20 mbar) to give 4.00 g (ca. 100%) of a colorless oil, which was used in the following step without further purification.

1H NMR (200 MHz, CDCl3): 0.98(t, J=7.3 Hz, 6H, CH3), 1.08 (s, 6H, CH3), 1.77 (sextet, J=7.5 Hz, 4H, CH2), 2.33 (t, J=7.3 Hz, 4H, CH2). 13C NMR (50 MHz, CDCl3): 13.7, 19.1, 19.7, 28.3, 59.8, 182.7. IR(neat): = 2965 cm-1, 2874, 1737, 1699, 1576, 1464, 1375, 1075, 929. C11H20N2 (180.3): HRMS (EI) [M-H]+ calcd. 179.1548; found 179.1548.

**(1,4,4a,7a)-4,4a,7,7a-Tetrahydro-1,4-dipropyl-8,8-dimethyl-1,4-methano[1*H*]-cyclopenta[d]pyridazin (1c):** To a cooled (0 °C) solution of 3.00 g (16.6 mmol) of 3,5-di-
*n*-propyl-4,4-dimethyl[4*H*]pyrazol in 50 mL of dichloromethane were added 43 mL (519 mmol) of cyclopentadiene, followed by 603 L (7.89 mmol) of triflouroacetic acid, and stirred for 15 min. The mixture was stored at 0-5 °C for 9 d and neutralized with an excess of K2CO3. The solvent and unreacted cyclopentadiene were evaporated (20 °C, 10 mbar) and the remaining dark brown oil was purified by double silica-gel chromatography [dichloromethane/petrolether (1:5) as eluent] to yield 1.63 g (6.62 mmol, 40%) of a pale brown oil.

1H NMR (200 MHz, CDCl3): 0.46(s, 3H, CH3), 0.84 (s, 3H, CH3), 1.08 (t, J=7.0 Hz, 3H, CH3), 1.09 (t, J=7.0 Hz, 3H, CH3), 1.55-2.32 (m, 10H), 2.72-2.84 (m, 1H, CH), 3.16-3.24 (m, 1H, CH), 5.39-5.46 (m, 1H, CH=), 5.58-5.64 (m, 1H, CH=). 13C NMR (50 MHz, CDCl3): 15.0, 16.8, 17.8, 18.8, 18.9, 30.1, 30.2, 31.3, 42.4, 55.7, 59.3, 92.2, 92.4, 128.5, 133.2.
UV(C6H6): max (log ) = 363 nm (2.40). IR(neat): = 3050 cm-1, 2970, 1700, 1465, 1255, 1120, 935. Anal. Calcd. for C16H26N2 (246.4): C, 77.99; H, 10.64; N, 11.37; found: C, 77.63; H, 10.49; N, 11.19.

**Synthesis of the Azoalkane 1d**

**1,5-Dibromo-3,3-dimethylpentane-2,4-dione**S[[1]](#endnote-2): A solution of 4.99 g (31.2 mmol) of bromine in 10 mL of acetic acid was added within 1 h to a cooled solution (ca. 10-15 °C) of 2.00 g (15.6 mmol) of 3,3-dimethylacetylacetone in 75 mL acetic acid. After 2 h of stirring at ca. 20 °C, 4.59 g (46.8 mmol) of Potassiumacetate was added, followed by 30 mL of water, and the mixture was extracted with 200 mL of *tert*-butyl methyl ether. The combined organic phases were washed with water (1 x 50 mL), sat. Na2S2O3 solution (1 x 50 mL), and sat. NaCl solution (1 x 50 mL), dried over MgSO4, and the solvent evaporated (40 °C, 20 mbar) to yield 4.30 g (15.0 mmol, 96%) of a brown oil.

1H NMR (200 MHz, CDCl3): 1.53 (s, 6H, CH3), 4.11 (s, 4H, CH2).

**1,5-Diacetoxy-3,3-dimethylpentane-2,4-dione**: A solution of 562 mg (1.97 mmol) of
1,5-dibromo-3,3-dimethylpentane-2,4-dione, 578 mg (5.90 mmol) of K2CO3 and 51.0 mg (197 mol) of 18-crown-6 in 10 mL of acetonitrile was heated to reflux for 18 h. After addition of 30 mL of *tert*-butyl methyl ether, the mixture was extracted with water
(1 x 10 mL) and sat. NaCl solution (2 x 10 mL), dried over MgSO4. The solvent was evaporated (40 °C, 20 mbar) to yield 257 mg (1.05 mmol, 54%) of a brown oil, which was used in the following reaction without further purification. An analytic sample was prepared by recrystallization from ethyl acetate/petroleum ether to afford pale yellow plates,
mp 49-50 °C.

1H NMR (200 MHz, CDCl3): 1.42(s, 6H, CH3), 2.14 (s, 6H, CH3), 4.78 (s, 4H, CH2).
13C NMR (50 MHz, CDCl3): 20.0, 20.5, 58.7, 65.4, 170.6, 202.6. IR(KBr): = 2995 cm-1, 2950, 1750, 1713, 1419, 1377, 1239, 1047, 1010, 975, 850. Anal. Calcd. for C11H16O6 (224.2): C, 54.09, H, 6.60; found: C, 53.88; H, 6.57.

**3,5-Di(acetoxymethyl)-4,4-dimethyl[4*H*]pyrazol:** A sample of 256 mg (5.12 mmol) of hydrazine hydrate was added to a solution of 1.14 g (4.66 mmol) of 1,5-diacetoxy-3,3-dimethylpentane-2,4-dione in 80 mL of chloroform. The mixture was stirred for 4 d at ca. 20 °C, dried over Na2SO4, and the solvent was evaporated (40 °C, 20 mbar) to yield 1.09 g (97%) of a brown oil.

1H NMR (200 MHz, CDCl3): 1.33 (s, 6H, CH3), 2.15 (s, 6H, CH3), 5.06 (s, 4H, CH2).
13C NMR (50 MHz, CDCl3): 19.4, 20.2, 58.4, 59.9, 170.8, 178.7. IR(neat): = 2985 cm-1, 2939, 1747, 1583, 1431, 1369, 1227, 1046, 838. C11H16N2O4 (240.3): HRMS (EI) [M]+ calcd. 240.1110; found 240.1109.

**(1,4,4a,7a)-4,4a,7,7a-Tetrahydro-1,4-di(acetoxymethyl)-8,8-dimethyl-1,4-methano-[1*H*]cyclopenta[d]pyridazin (1d):** To a cooled (0 °C) solution of 300 mg (1.25 mmol) of 3,5-di(acetoxymethyl)-4,4-dimethyl[4*H*]pyrazol in 25 mL of dichloromethane were added 2.06 g (32.0 mmol) of cyclopentadiene, followed by 42.8 mg (375 mol) of trifluoroacetic acid, and stirred for 10 min. The solution was stored at 0 to 5 °C for ca. 3 d, an excess of K2CO2 was added, and stirred for another 15 min. The solvent and unreacted cyclopentadiene were evaporated (20 °C, 10 mbar) and the remaining dark brown oil was purified by silica-gel chromatography [ethyl acetate/dichloromethane (1:5) as eluent] to yield 279 mg (73%) of a pale brown oil.

1H NMR (200 MHz, CDCl3): 0.62 (s, 3H, CH3), 1.00 (s, 3H, CH3), 2.05-2.42 (m, 2H, CH2), 2.13 (s, 3H, CH3), 2.15 (s, 3H, CH3), 2.86-3.01 (m, 1H, CH), 3.34-3.47 (m, 1H, CH), 4.67 (d, J=12.3 Hz, 1H), 4.81(d, J=12.3, 1H), 4.88 (d, J=12.3, 1H), 4.96 (d, J=12.4, 1H), 5.43-5.52 (m, 1H, C=CH), 5.57-5.65 (m, 1H, C=CH). 13C NMR (50 MHz, CDCl3): 16.8, 17.5, 20.5, 30.8, 40.7, 54.0, 59.0, 60.7, 60.7, 91.3, 91.4, 127.2, 133.9, 171.4, 171.5. UV(C6H6): max (log ) = 357 nm (2.42). IR(neat): = 2944 cm-1, 1739, 1446, 1364, 1236, 1036. Anal. Calcd. for C16H22N2O4 (306.4): C, 62.73; H, 7.24; N, 9.14 Found: C, 62.60; H, 7.15; N, 9.15.

**General Procedure for the Synthesis of the Housanes 2c,d:** A sample of ca. 0.150 mmol of the appropriate azoalkane **1** was dissolved in pentane (*ca*. 0.7 mL), transferred to a NMR tube, deareated by purging with a slow stream of argon gas for 10 min, and irradiated at the
333-nm, 351-nm and 364-nm lines of the argon-ion laser at 20 °C for ca. 10 min. The pale yellow photolysate was passed through a short column of basic alumina (ca. 2.0 g), the solvent evaporated (20 °C, 20 mbar), and the respective diastereomeric mixtures of the housanes **2** were isolated in quantitative yield as a colorless oil, which could not be separated by chromatography. Thermolysis of the mixture at elevated temperature (>90 °C) afforded the pure *anti* isomer. The *syn* isomer was spectrally characterized direct in the mixture of diastereomers.

***endo*-3,3-Dimethyl-2,4-dipropyltricyclo[3.3.0.02,4]oct-6-ene** (*anti*-**2c** Housane). 1H NMR (200 MHz, toluene-d8):  0.88 (t, J=7.2 Hz, 3H, CH3), 0.90 (t, J=7.0 Hz, 3H, CH3), 0.97 (s, 3H, CH3), 0,98-1,48 (m, 6H), 1.23 (s, 3H, CH3), 1.55-1.75 (m, 2H), 2.32-2.49 (m, 3H), 2.75-2.85 (m, 1H, CH), 5.63-5.73 (m, 1H, CH=), 5.74-5.85 (m, 1H, CH=). 13C NMR (63 MHz, toluene-d8): 14.38, 14.43, 16.1, 19.6, 20.9, 25.4, 26.5, 27.2, 33.7, 36.5, 37.7, 43.4, 48.8, 131.5, 132.0. IR(neat): = 3047 cm-1, 2928, 1709, 1464, 1375. Anal. Calcd. for C16H26 (218.4):
C, 88.00; H, 12.00; Found: C, 87.66; H, 11.46.

***exo*-3,3-Dimethyl-2,4-dipropyltricyclo[3.3.0.02,4]oct-6-ene** (*syn*-**2c** Housane). 1H NMR (200 MHz, toluene-d8):  0.85 (s, 3H, CH3), 1.55 (s, 3H, CH3), 2.54-2.68 (m, 1H, CH), 2.97-3.09 (m, 1H, CH), 5.53-5.65 (m, 1H, CH=); the remaining peaks overlap with signals of the *anti* diastereomer. 13C NMR (63 MHz, toluene-d8): 24.1, 29.0, 31.9, 32.7, 35.7, 36.2, 36.6, 37.4, 39.1, 49.2, 134.1, 137.4; the remaining peaks overlap with signals of the *anti* diastereomer.

***endo*-3,3-Dimethyl-2,4-di(acetoxymethyl)tricyclo[3.3.0.02,4]oct-6-ene** (*anti*-**2d** Housane). 1H NMR (200 MHz, toluene-d8): 1.09 (s, 3H, CH3), 1.21 (s, 3H, CH3), 1.65 (s, 3H, CH3), 1.69 (s, 3H, CH3), 2.28-2.67 (m, 3H), 2.82-2.90 (m, 1H, CH), 3.88 (d, J=12.2 Hz, 1H), 3.92 (d, J=12.7 Hz, 1H), 4.34 (d, J=12.8 Hz, 1H), 4.40 (d, J=12.4 Hz, 1H), 5.64-5.73 (m, 1H, CH=), 5.74-5.83 (m, 1H, CH=). 13C NMR (63 MHz, toluene-d8): 15.9, 18.7, 20.37, 20.42, 30.6, 33.6, 37.6, 37.8, 44.2, 48.5, 60.4, 61.5, 134.4, 132.8, 169.85, 169.92. IR(neat): = 2939 cm-1, 1739, 1442, 1378, 1230, 1024, 960. Anal. Calcd. for C16H22O4 (278.4): C, 69.04; H, 7.97; found: C, 68.87; H, 7.68.

***exo*-3,3-Dimethyl-2,4-di(acetoxymethyl)tricyclo[3.3.0.02,4]oct-6-ene** (*syn*-**2d** Housane).
1H NMR (200 MHz, toluene-d8): 0.94 (s, 3H, CH3), 1.50 (s, 3H, CH3), 1.72 (s, 6H, CH3), 3.25-3.38 (m, 1H, CH), 4.12-4.28 (m, 4H, CH2), 5.50-5.58 (m, 1H, CH=); the remaining peaks overlap with signals of the *anti* diastereomer. 13C NMR (63 MHz, toluene-d8):
17.8, 22.8, 32.4, 35.0, 35.7, 37.7, 47.6, 65.6, 66.0, 131.1, 132.8; the remaining peaks overlap with signals of the *anti* diastereomer.

**Product Studies of the Azoalkanes 1**: For the direct photolyses, a sample of ca. 0.070 mmol of the azoalkane **1** in *d*8-toluene (0.6 mL) was transferred to a NMR tube, deareated by purging with a slow stream of argon gas for 10 min, and irradiated at all laser lines (widened to ca. 2.5 cm by a lens) of the argon-ion laser at the temperature specified in Table 1 (see main text). For the quenching experiments, *trans*-piperylene (1 M) was employed as triplet quencher and irradiated at all laser lines. In the triplet-sensitized photolyses, benzophenone
(1 M) was used as sensitizer and irradiated at the 333-nm laser line. The results are listed in Table 1.

**Semiempirical Calculations.** The calculations of the triplet diradical **3DR**(**d**) were carried out with the Gaussian 98 program package.10 The dihedral angle  (Figure 1) of the *n*-propyl substituent was increased in 5° steps and a geometry optimization was carried out for each conformation by the AM1 method. Figure 1 shows the relative heats of formation of the optimized structures versus the fixed dihedral angle 

#### Additional Reference

1. S?W. Adam, J. N. Moorthy, W. M. Nau, J. C. Scaiano, Solvent effect on product distribution in photochemical pathways of  C-N versus  C-C cleavage of n, triplet-excited azoalkanes, *J. Am. Chem. Soc*., 1997, **119**, 5550-5555. [↑](#endnote-ref-2)
